# Supplementary material for: Farewell to GBM-O: Genomic and transcriptomic profiling of glioblastoma with oligodendroglioma component reveals distinct molecular subgroups
Source: Acta Neuropathol Commun. 2016 Jan 13;4:4. doi: 10.1186/s40478-015-0270-7 (PMC4711079; doi:10.1186/s40478-015-0270-7)
Supplement: Additional file 6: Table S5. — Expression values for select genes. (XLSX 148 kb) [file 40478_2015_270_MOESM6_ESM.xlsx]

## Sheet: Sheet1
Classical (C)
Proneural (P)		Green = Genes with Differential Expression
Mesenchymal (M)
	C	C	C > N	P	P	P	M>C=N	M
Case #	4	7	5	2	1	6	8	3
Classical
EGFR	291.317	694.485	368.124	4.70885	13.8886	10.9654	210.17	3.20157
NES	18.6212	72.9698	33.4713	6.32135	4.94446	11.7281	23.8985	36.4723
NOTCH3	5.43985	4.77614	4.56187	1.58903	0.800446	4.65053	9.87776	2.67176
JAG1	6.28097	14.122	6.4199	2.14531	2.97766	7.71759	18.5774	14.1912
LFNG	0	0	0	0.0500993	0.0501712	0.0499109	0	0
LFNG	5.44979	18.8339	11.328	0.199298	0.604926	0.395876	8.55799	0
LFNG	0	15.4797	0	0	0	0	0	0
LFNG	0	0	0	0	0	0	0	0
SMO	3.66949	0.490148	0.727084	0.151204	0.319501	2.26435	2.43399	1.72068
GAS1	22.9719	27.4259	4.95364	0	2.60216	5.85317	8.57691	0
GLI2	0.0159945	0.0226895	0.0161075	0.0161293	0.0161372	0.0161087	0.0161126	0.0227365
Mesenchymal
CHI3L1	114.611	56.9505	26.0268	3.59705	1.12725	124.411	142.504	2802.78
MET	0.477586	0.351923	0.399721	0.228598	0	0	0.0593631	0
CD44	0	0	8.84579	0	0	0	0	0
CD44	11.9619	22.781	15.3555	8.56359	5.3886	0	22.1857	0
MERTK	13.7421	10.7006	5.51978	2.52091	3.99248	7.06589	10.8501	7.92509
TRADD	0.265539	1.92057	0.939246	0.110952	0.198033	0.150395	2.15037	0.355732
RELB	0.166123	0.118382	0.15477	0.038767	0.12368	0.228598	0.770286	1.39557
TNFRSF1A	9.59209	3.86843	7.53209	1.4437	2.18093	5.26065	17.0533	12.8611
Proneural
PDGFRA	6.5588	15.7028	42.481	1.8781	16.2608	539.759	8.96743	0.0165042
NKX2-2	1.70891	0.737705	1.96162	0.991807	2.50603	4.05163	3.75965	1.1766
OLIG2	25.4028	31.3328	31.6977	8.201	31.2027	64.5472	15.4403	3.87337
DCX	0.0439327	0	0.0447511	3.42969	10.9319	4.52809	0.0179577	0.0649892
DCX	1.20315	0	2.70922	7.30345	8.62932	7.65388	0.0548141	2.77085
DLL3	4.55226	3.81317	4.91568	3.37869	15.9813	9.46963	0.848217	0
DLL3	6.46365	2.64587	5.43315	2.62671	8.23422	5.78748	0	0.214334
ASCL1	12.7471	16.482	6.24912	4.38902	6.52004	11.0891	1.22581	0.356732
TCF4	17.5761	14.3837	12.1535	3.07636	14.768	14.267	0.166757	0.126596
TCF4	13.0016	11.2139	6.26848	2.70218	7.5383	11.1328	9.15846	0
TCF4	13.4819	11.5049	0	2.96875	7.85775	11.1005	10.9897	0
Neural
NEFL	1.52339	5.53155	14.4956	0.865004	2.14035	10.8814	0	0
GABRA1	1.03857	1.01279	1.29081	0.0469294	0.418506	0.097623	0.0535178	0
SYT1	5.88989	1.7741	25.3917	0.731882	2.39588	3.44578	0.310948	0.590919
SLC12A5	0.96137	0.197505	0.017991	0.0993219	0.785395	0.351774	0.168093	0
SLC12A5	0.044835	0.0262506	2.34638	0.0263649	0.0448945	0.0319704	0.0181184	0
